# Supplementary material for: Thermoelectric properties of single crystal CuAlO2 with a layered structure
Source: Royal Society of Chemistry journal article supplement (doi:10.1039/b006850k), 2001-01-01
Supplement: b006850k1.doc [file b006850k1.doc]

**
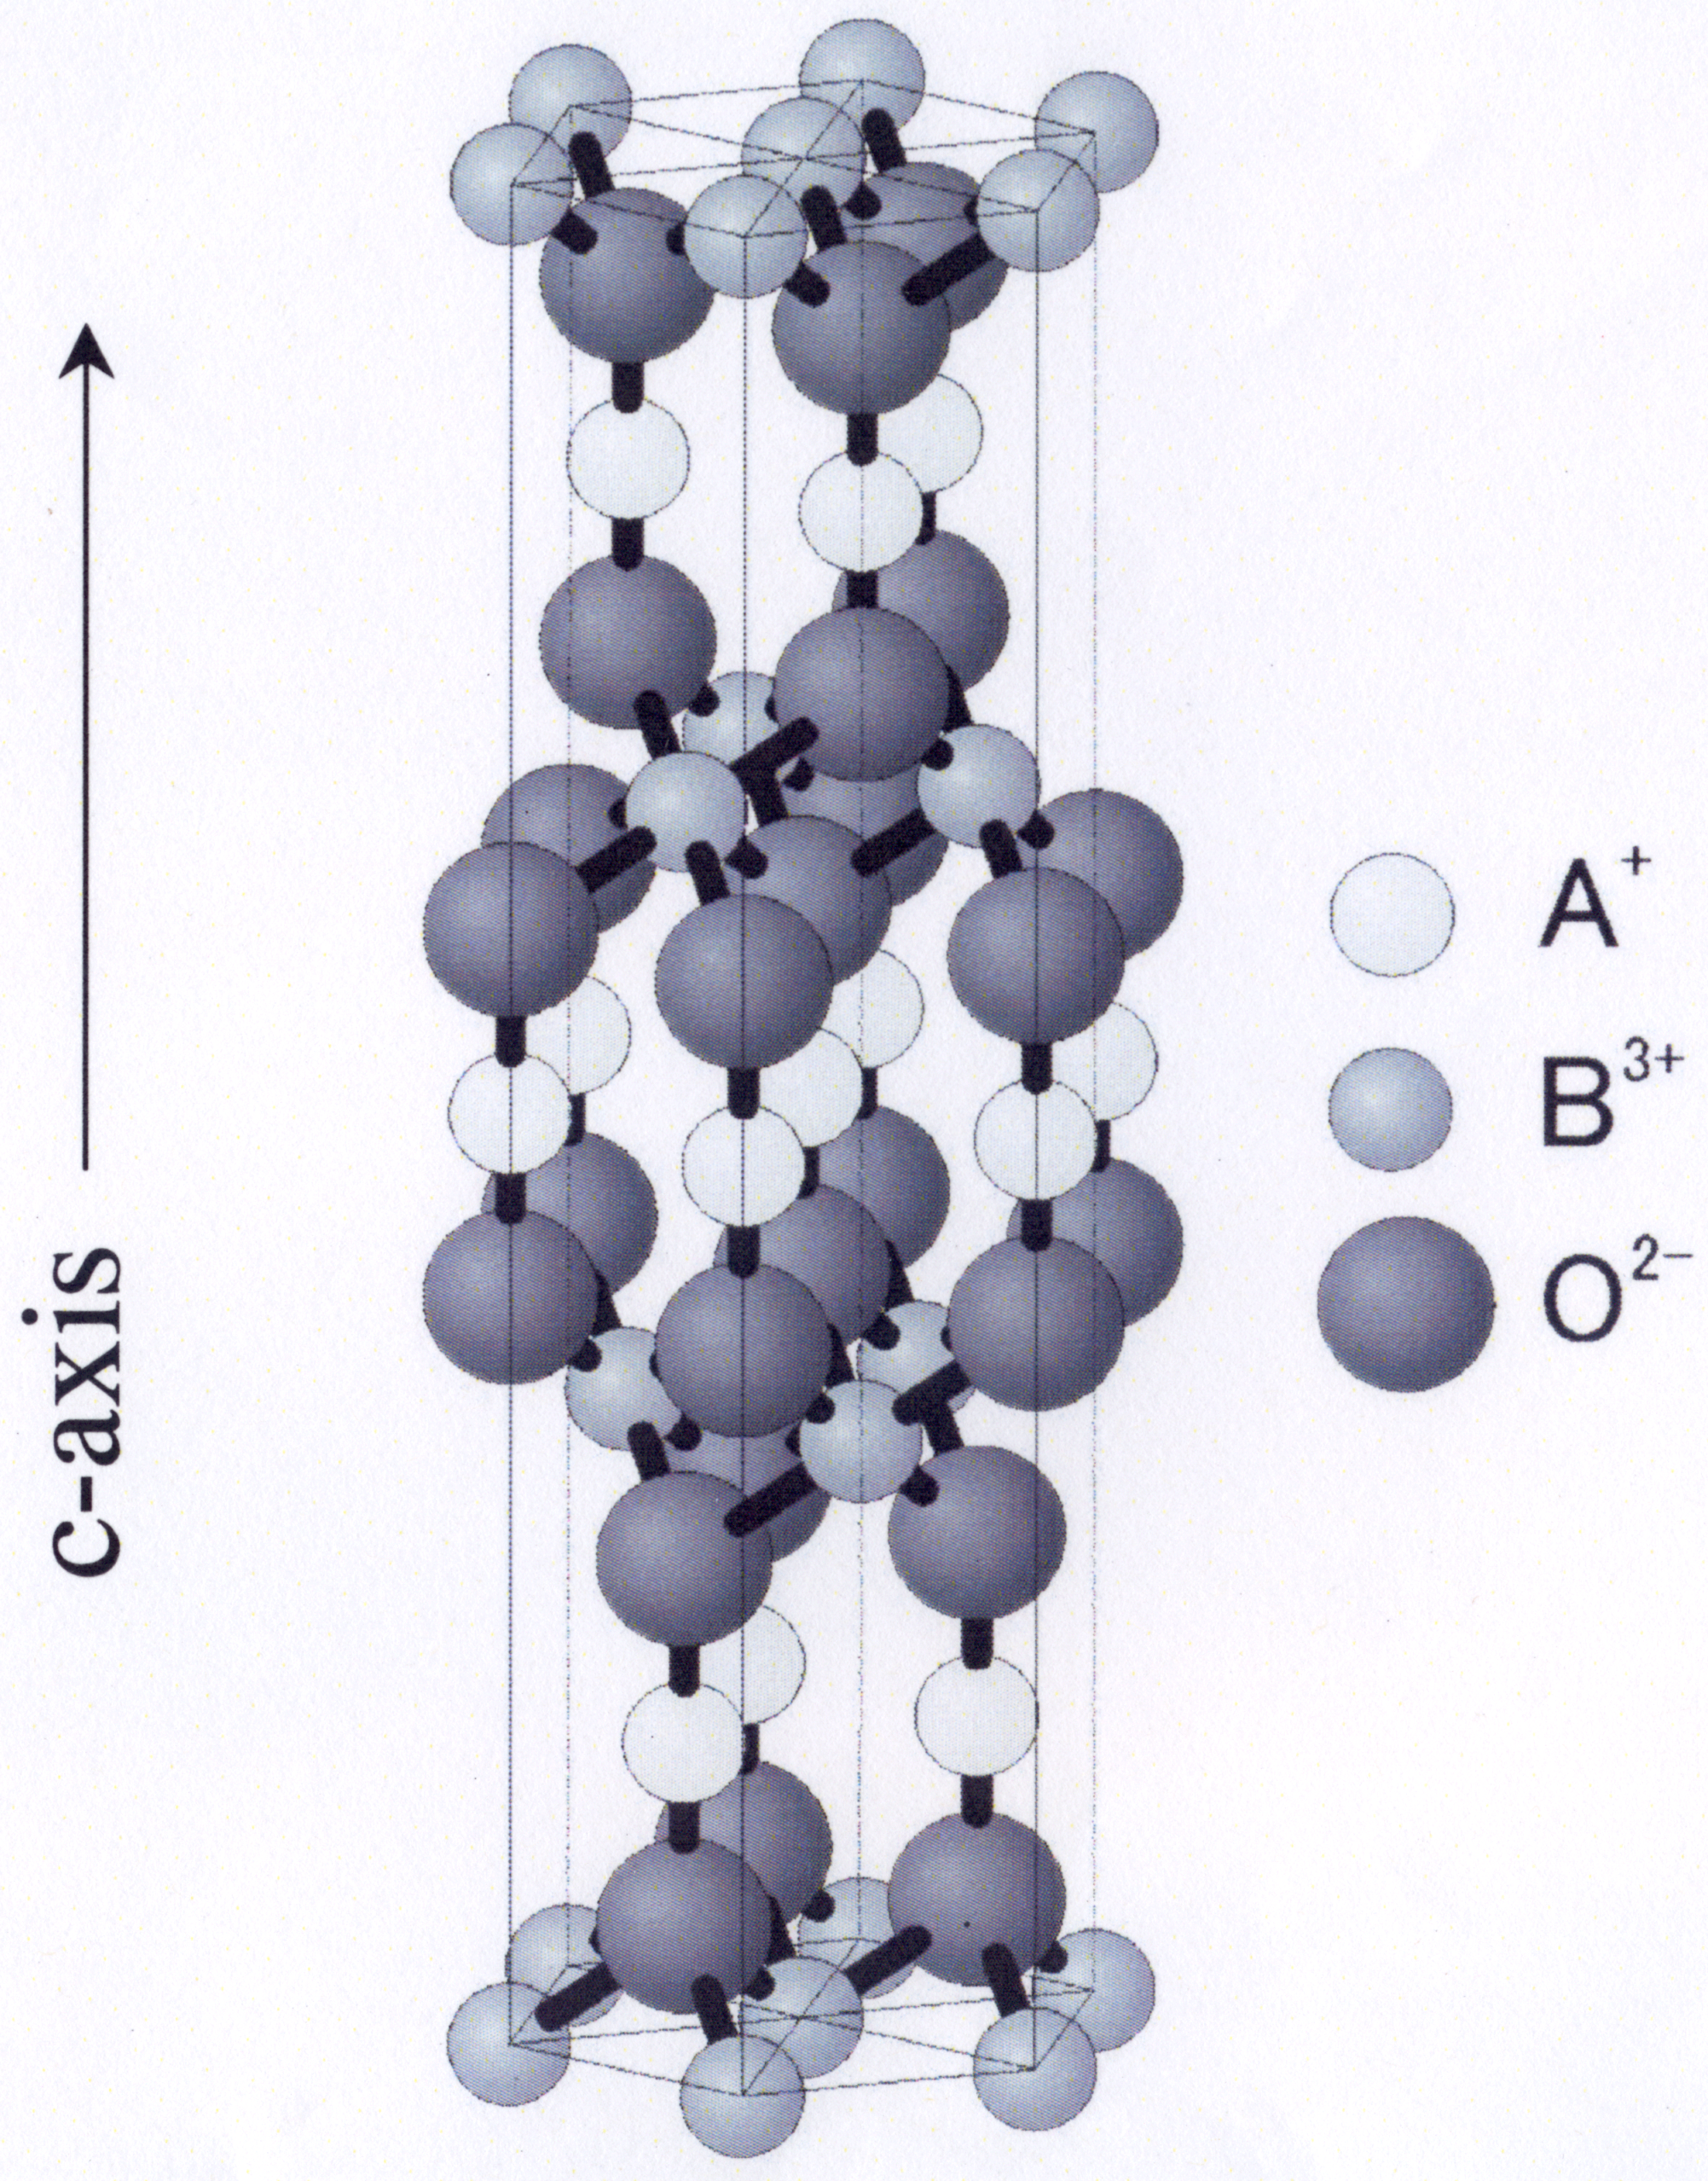
**

**Fig. S1** Crystal structure of delafossite-type ABO2. A+ ions are two-fold and B3+ ions are six-fold coordinated to O2-, respectively.
