# Supplementary material for: Thermoelectric properties of single crystal CuAlO2 with a layered structure
Source: Royal Society of Chemistry journal article supplement (doi:10.1039/b006850k), 2001-01-01
Supplement: b006850k4.doc [file b006850k4.doc]

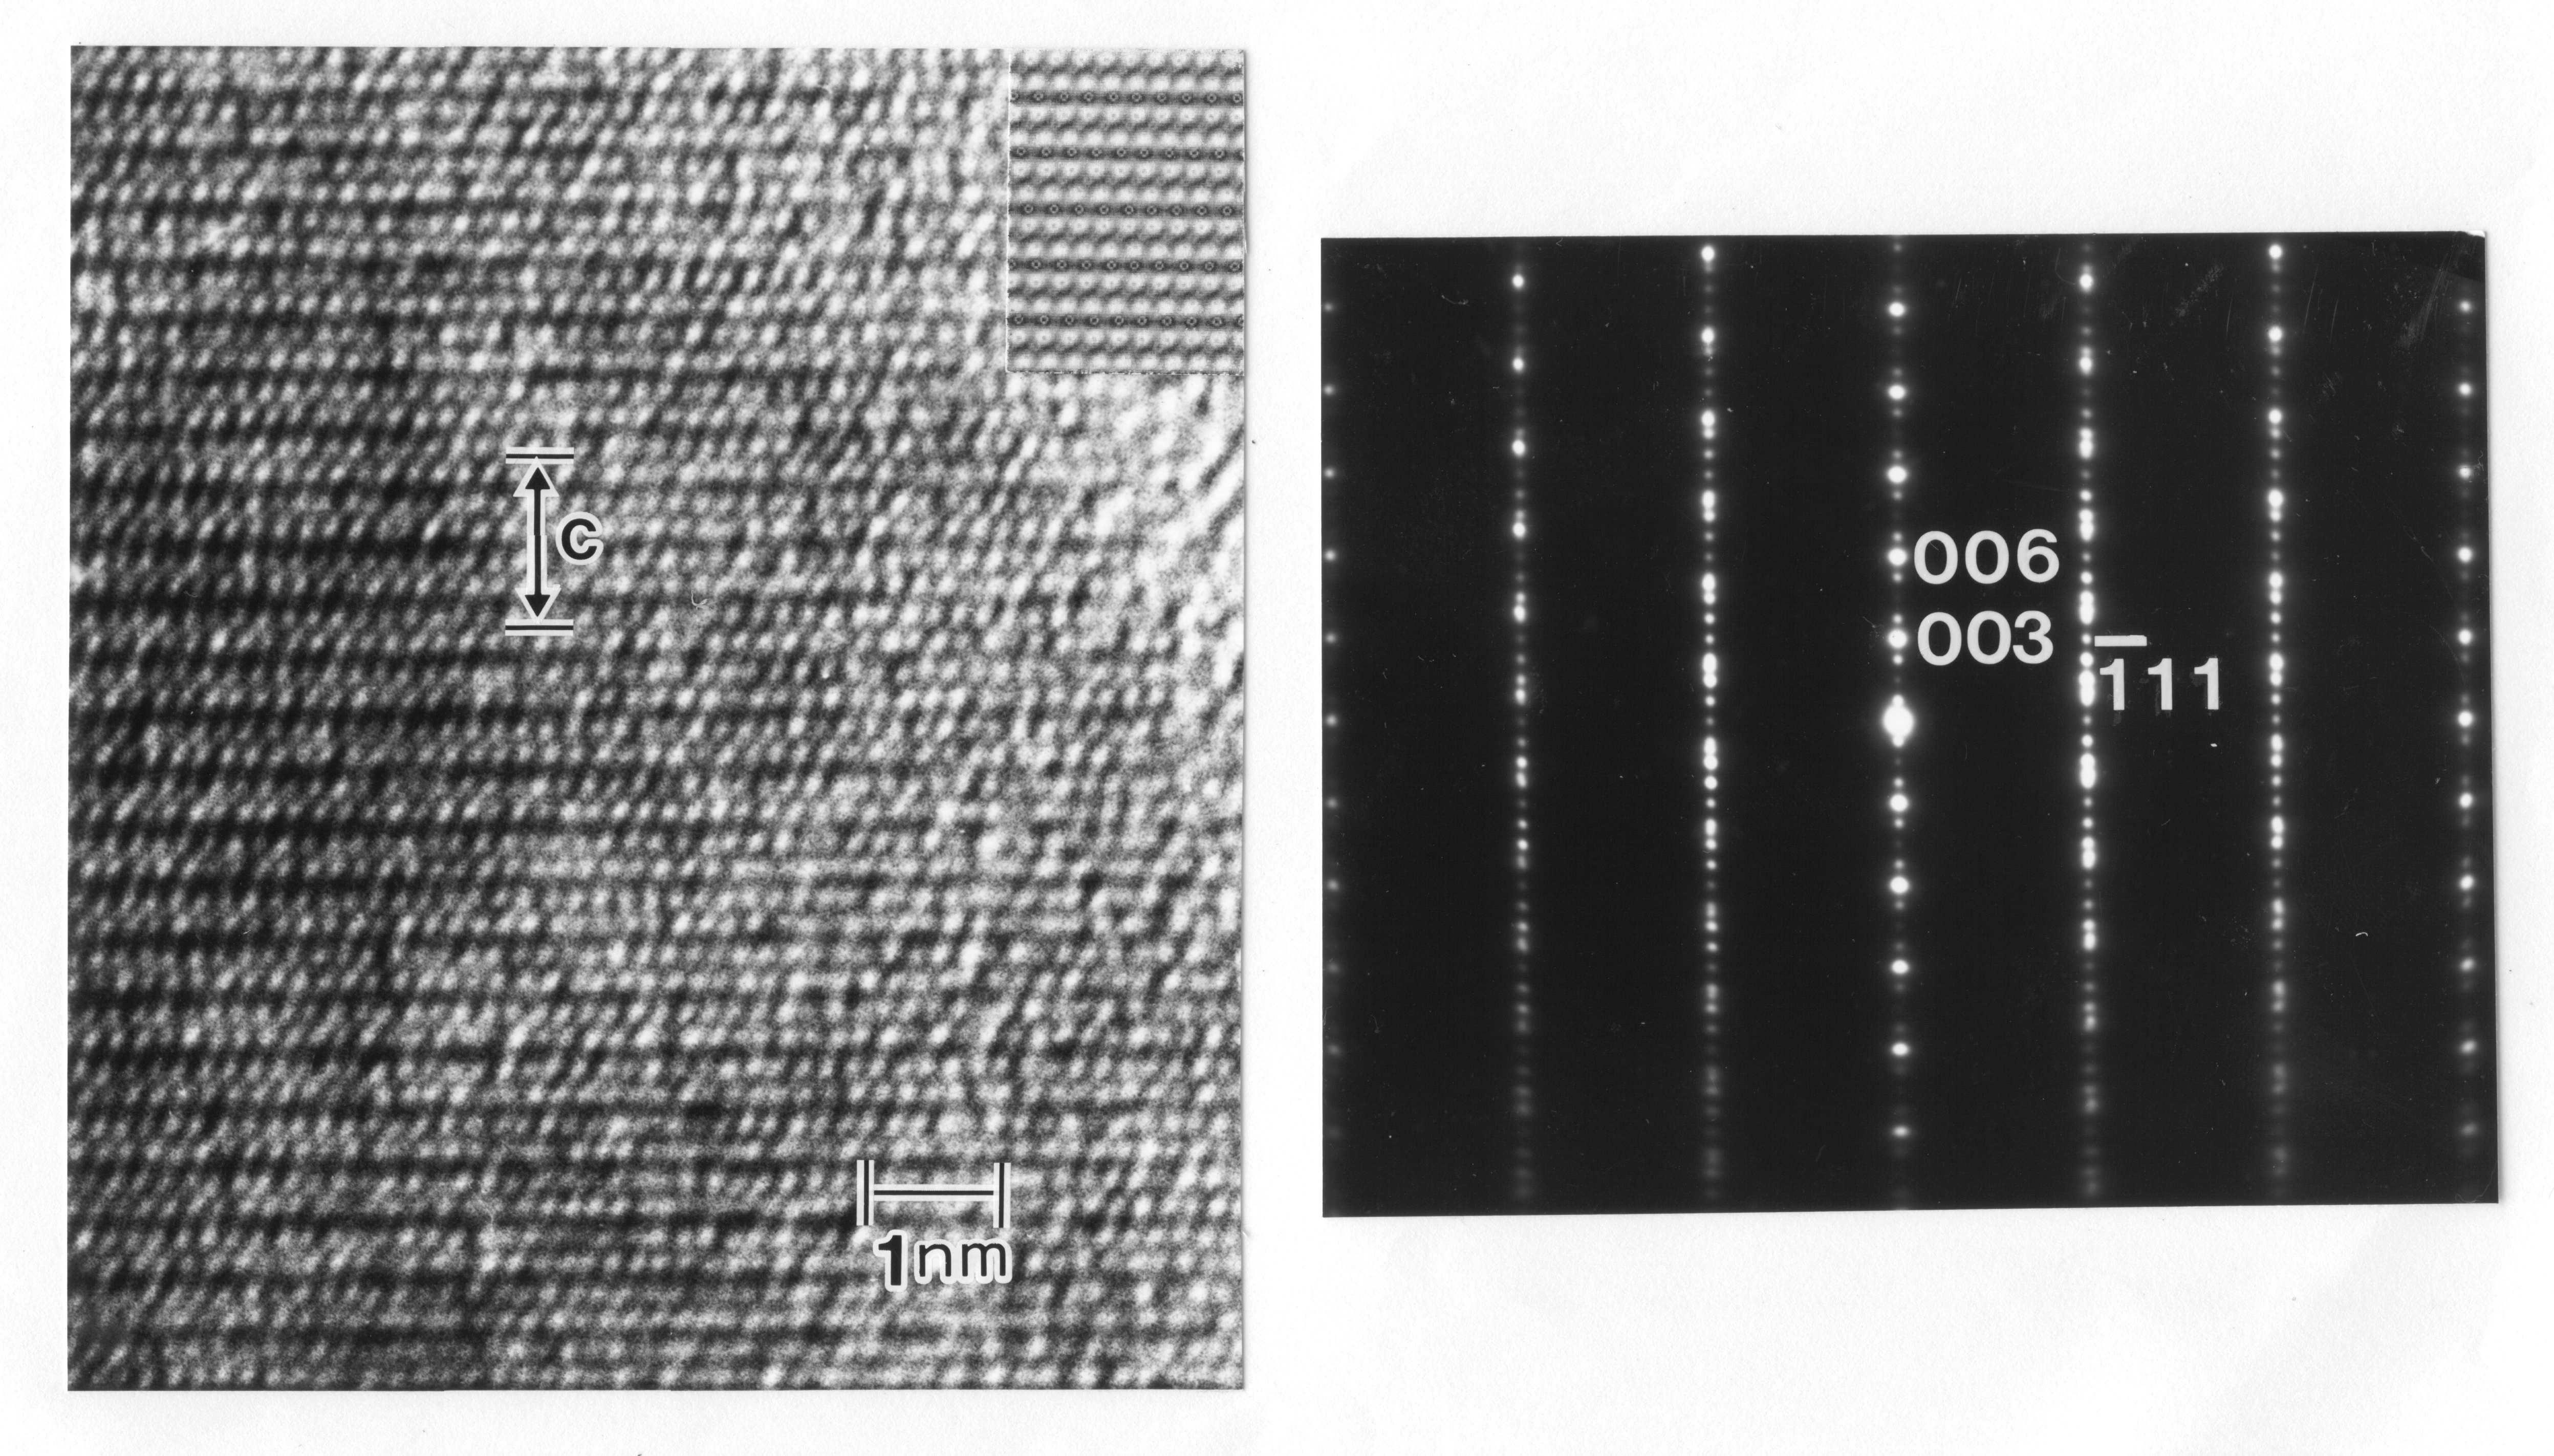


**Fig. S4** HRTEM image viewed along the <110> direction and an electron diffraction pattern for CuAlO2 single crystal. The insert shows a calculated image demonstrating a two-dimensional layered structure.
