# Supplementary figures and images for: Thermoelectric properties of single crystal CuAlO2 with a layered structure
Source: Royal Society of Chemistry journal article supplement (doi:10.1039/b006850k), 2001-01-01

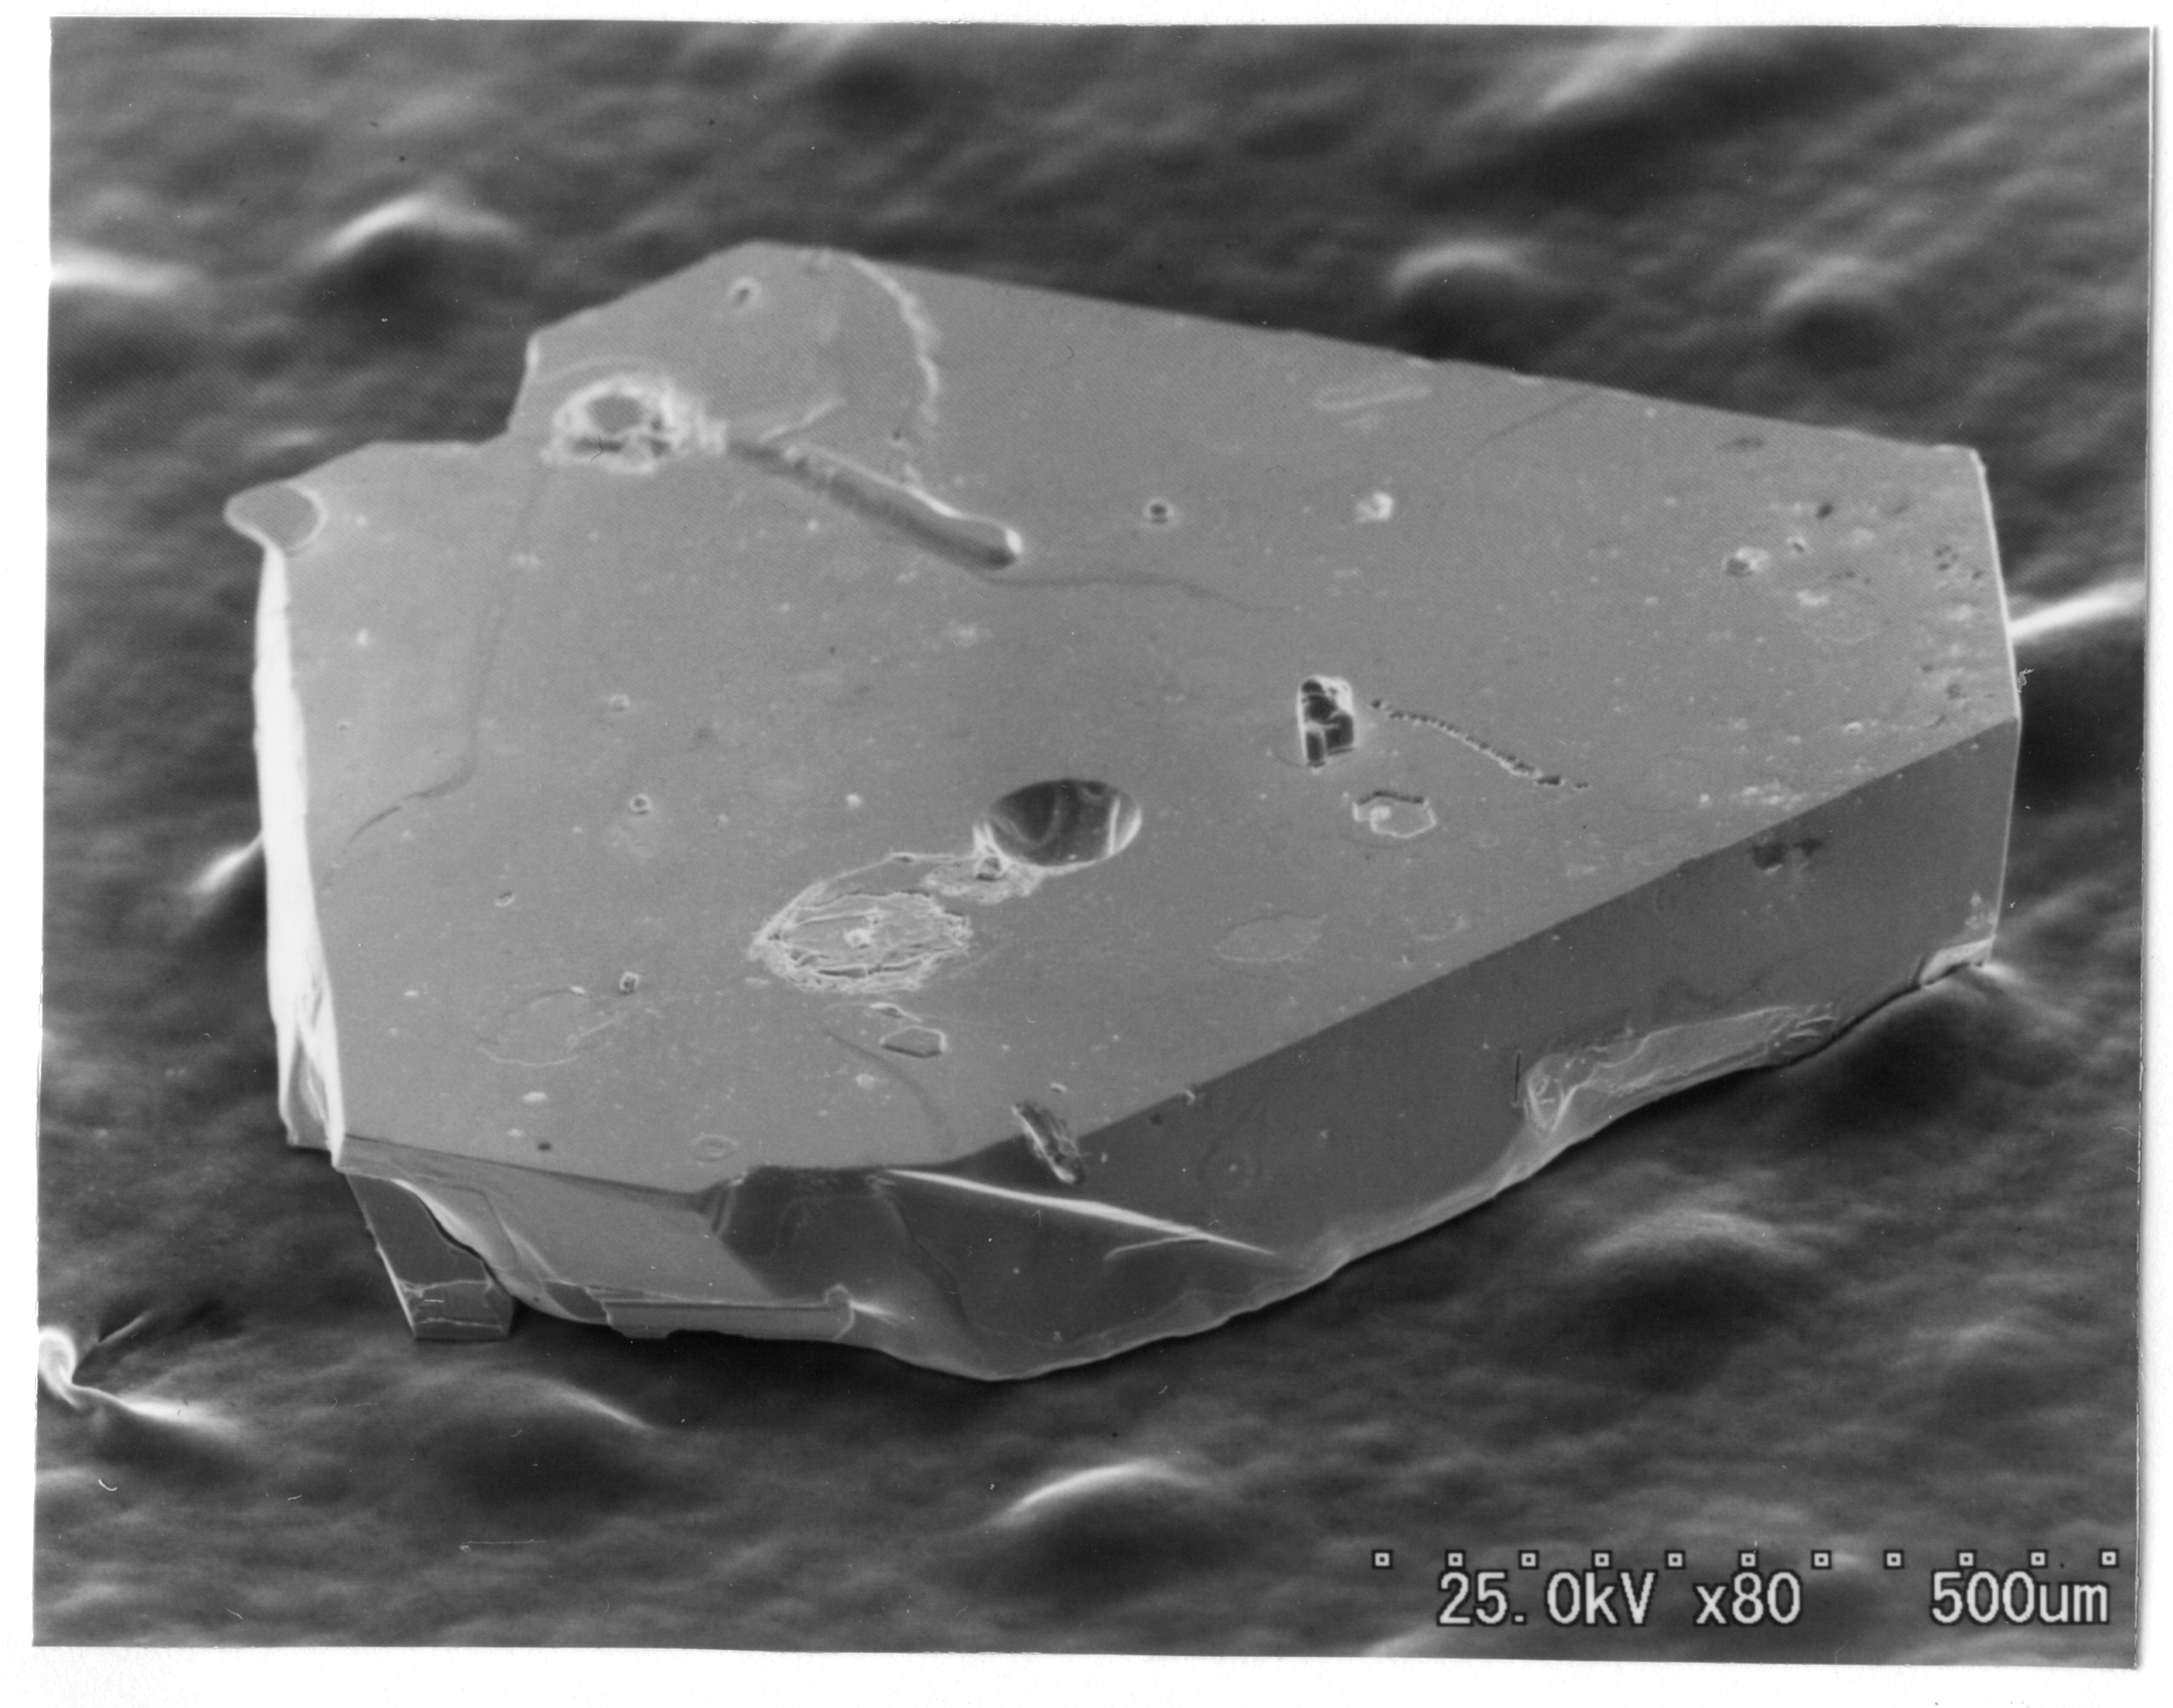


**Fig. S2** Scanning electron micrograph of a single crystal of CuAlO2.

Supplement: b006850k2.doc [file b006850k2.doc]
